# Supplementary material
Source: Springer Nature journal article supplement (https://www.springermedizin.de/resource/supplementary/12889_2006_693_MOESM1_ESM.pdf/9502326)
Supplement: MOESM1 [file 9502326]

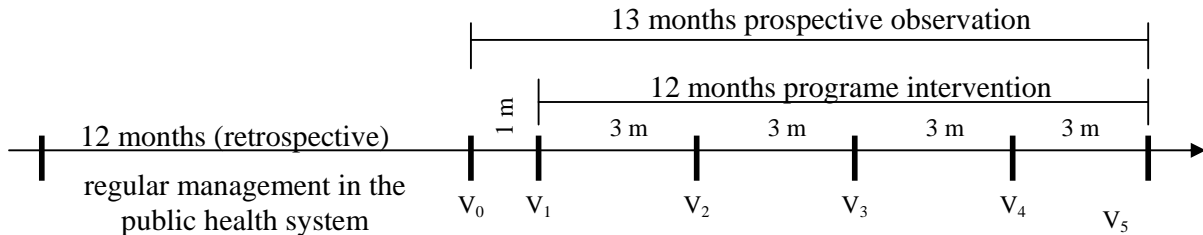

V<sub>0</sub>: self-report on morbidity, AQLQ, ACQ, family costs questionnaire

V<sub>1</sub>: self-report on morbidity, AQLQ, ACQ, lung function

V<sub>2</sub>: self-report on morbidity, AQLQ, ACQ

V<sub>3</sub>: self-report on morbidity, AQLQ, ACQ, lung function

V<sub>4</sub>: self-report on morbidity, AQLQ, ACQ

V<sub>5</sub>: self-report on morbidity, AQLQ, ACQ, family costs questionnaire, lung function
